# Hepatitis B Virus Infection as a Neglected Tropical Disease

Geraldine A O'Hara<sup>\*1,2</sup>, Anna L McNaughton<sup>\*3</sup>, Tongai Maponga<sup>4</sup>,  
Pieter Jooste<sup>5</sup>, Ponsiano Ocama<sup>2</sup>, Roma Chilengi<sup>6</sup>, Jolynne Mokaya<sup>7</sup>,  
Mitchell I Liyayi<sup>8</sup>, Tabitha Wachira<sup>9</sup>, David M Gikungi<sup>10</sup>,  
Lela Burbridge<sup>11</sup>, Denise O'Donnell<sup>11</sup>, Connie S Akiror<sup>12</sup>, Derek Sloan<sup>13</sup>,  
Judith Torimiro<sup>14,15</sup>, Louis Marie Yindom<sup>16</sup>, Robert Walton<sup>17</sup>, Monique  
Andersson<sup>4,18</sup>, Kevin Marsh<sup>3,19</sup>, Robert Newton<sup>2,20</sup>, Philippa C Matthews<sup>3,18</sup>

\*These authors contributed equally to this work

<sup>1</sup> London School of Hygiene and Tropical Medicine, Keppel Street, London  
WC1E 7HT, UK

<sup>2</sup> MRC/UVRI Uganda Research Unit, P.O. Box 49, Entebbe, Uganda

<sup>3</sup> Nuffield Department of Medicine, Peter Medawar Building for Pathogen  
Research, South Parks Road, Oxford OX1 3SY, UK

<sup>4</sup> Division of Medical Virology, Stellenbosch University, Faculty of Medicine  
and Health Sciences, Tygerberg, Cape Town 7500, South Africa

<sup>5</sup> Department of Paediatrics, Kimberley Hospital, 114 Du Toitspan Road,  
Kimberley 8300, South Africa

<sup>6</sup> Centre for Infectious Disease Research in Zambia, Plot 5032, Great North  
Road, Lusaka, Zambia

<sup>7</sup> KEMRI Wellcome Trust Research Programme, Kilifi, Kenya

<sup>8</sup> Family Health International, Baringo County Referral Hospital, Baringo,  
Kenya

<sup>9</sup> Machakos Level 5 Hospital, Machakos, Kenya

<sup>10</sup> Garissa County Referral Hospital, Garissa, Kenya

<sup>11</sup> Patient and Public Involvement Committee, Translational Gastroenterology  
Unit, Nuffield Department of Medicine, John Radcliffe Hospital, Headley Way,  
Oxford, OX3 9DU, UK

32 <sup>12</sup> Global Healthcare Public Foundation, Makindu Lane, Kololo, Kampala,  
33 Uganda

34 <sup>13</sup> University of St Andrews, School of Medicine, Medical & Biological  
35 Sciences, North Haugh, St Andrews KY16 9TF, Scotland, UK

36 <sup>14</sup> Chantal Biya International Reference Centre for Research on HIV/AIDS,  
37 Yaounde, Cameroon

38 <sup>15</sup> Faculty of Medicine and Biomedical Sciences, University of Yaounde I,  
39 Yaounde, Cameroon

40 <sup>16</sup> Nuffield Department of Medicine, University of Oxford, Old Road Campus  
41 Research Building, Roosevelt Drive, Oxford OX3 7FZ, UK  
42 Oxford, OX3 7FZ, UK

43 <sup>17</sup> Warwick Medical School, University of Warwick, Coventry CV4 7AL, UK

44 <sup>18</sup> Department of Infectious Diseases and Microbiology, Oxford University  
45 Hospitals NHS Foundation Trusts, John Radcliffe Hospital, Headley Way,  
46 Oxford OX3 9DU, UK

47 <sup>19</sup> Africa-Oxford (AfOx) Initiative, Peter Medawar Building for Pathogen  
48 Research, South Parks Road, Oxford OX1 3SY, UK

49 <sup>20</sup> Department of Health Sciences, University of York, UK

50

51

52 **Corresponding author:** Email [philippa.matthews@ndm.ox.ac.uk](mailto:philippa.matthews@ndm.ox.ac.uk); Tel 0044  
53 1865 271973

54

55 **Running header:** HBV as an NTD

56

57 **Key words:** hepatitis b virus, HBV, neglected tropical disease, epidemiology,  
58 funding, eradication, public health, stigma

59

## 60 **BACKGROUND**

61 The Global Hepatitis Health Sector Strategy is aiming for ‘elimination of viral  
62 hepatitis as a public health threat’ by 2030 [1], while enhanced elimination  
63 efforts for hepatitis are also promoted under the broader remit of global  
64 Sustainable Development Goals (SDGs) [2]. This is an enormous challenge  
65 for hepatitis B virus (HBV) given the estimated global burden of 260 million  
66 chronic carriers, of whom the majority are unaware of their infection [3]  
67 (Figure 1).

68

69 We here present HBV within the framework for neglected tropical diseases  
70 (NTDs) [4], in order to highlight the ways in which HBV meets NTD criteria  
71 and to discuss the ways in which the NTD management paradigm could be  
72 used to strengthen a unified global approach to HBV elimination [5]. The  
73 major burden of morbidity and mortality from HBV is now borne by tropical  
74 and subtropical countries [6]. We here focus particular attention on Africa, as  
75 many African populations epitomize specific vulnerability to HBV [7].  
76 However, the themes we represent are transferable to other low and middle-  
77 income settings, and are relevant on the global stage.

78

## 79 **CURRENT STRATEGIES FOR HBV CONTROL**

80 Robust preventive vaccines have been rolled out in Africa since 1995 as a  
81 component of the Expanded Programme on Immunization (EPI). For adults  
82 with chronic infection and evidence of ongoing liver damage, a daily dose of  
83 suppressive antiviral therapy using nucleot(s)ide analogues (Table 1)  
84 successful at effecting viraemic suppression in the majority of cases,  
85 reducing complications and diminishing spread. Antiviral therapy does not  
86 commonly result in cure, due to the persistence of transcriptionally active  
87 DNA in the hepatocyte nucleus, but Interferon (IFN)-based therapy can  
88 increase rates of clearance.

89

90

**Table 1. Drug therapy used to treat HBV.** Costing is based on International medical products price guide: <http://mshpriceguide.org/en> (price for 3TC - South Africa Department of Health; price for TDF - Supply Chain Management Project; price for HBIG – Sudan MSF). WHO essential medicines: [http://who.int/medicines/publications/essentialmedicines/EML\\_2015\\_FINAL\\_amended\\_NOV2015.pdf?ua=1](http://who.int/medicines/publications/essentialmedicines/EML_2015_FINAL_amended_NOV2015.pdf?ua=1).

| Drug name                                        | Drug class                                 | Potency against HBV                   | Resistance                                                                       | Severe adverse effects                                                         | Safe in pregnancy? | Use in children               | Use as part of combined ART? | WHO 'essential medicine' | Monitoring           | Cost (International medical products price guide) |
|--------------------------------------------------|--------------------------------------------|---------------------------------------|----------------------------------------------------------------------------------|--------------------------------------------------------------------------------|--------------------|-------------------------------|------------------------------|--------------------------|----------------------|---------------------------------------------------|
| <b>Tenofovir (TDF)</b>                           | Nucleotide reverse transcriptase inhibitor | +                                     | Rare                                                                             | Lactic acidosis; hepatitis; renal injury; bone demineralisation                | Yes                | >12yrs for HBV*               | Yes                          | Yes                      | LFTs, renal function | \$3.91/month                                      |
| <b>Entecavir (ETV)</b>                           | Nucleoside reverse transcriptase inhibitor | ++                                    | <10% at 3 years. Increased in 3TC resistance                                     | Lactic acidosis; steatosis                                                     | Not known          | From age 2 years              | No                           | Yes                      | LFTs, FBC            | Not listed                                        |
| <b>Lamivudine (3TC)</b>                          | Nucleoside reverse transcriptase inhibitor | + (potentially limited by resistance) | 50% at 3 years. Best recognised mutations are in YMDD motif in viral polymerase. | Lactic acidosis; hepatomegaly and steatosis; pancreatitis                      | Yes                | From birth                    | Yes                          | Yes                      | LFTs, FBC            | \$1.43/month                                      |
| <b>Interferon (IFN)</b>                          | Biologic response modifier                 | + (genotype dependent)                | No                                                                               | Anorexia, diarrhea; flu-like symptoms; neurotoxicity; seizures; hepatotoxicity | No                 | Not recommended >18yrs only** | N/A                          | Yes                      | LFTs, FBC, TFTs      | Not listed                                        |
| <b>HBV Immunoglobulin (HBIG) for prophylaxis</b> | Biologic response modifier                 | ++                                    | N/A                                                                              | Abdominal pain; buccal ulceration; hest pain                                   | Yes                | From birth                    | N/A                          | No                       | N/A                  | \$38.02/dose                                      |

\* British National Formulary states Tenofovir can be prescribed for HIV in infants >2yrs, but data for HBV treatment are lacking.

\*\* British National Formulary states Peg-IFN-alpha can be prescribed for chronic HCV in infants >5yrs but data for HBV treatment are lacking.

<https://www.medicinescomplete.com/mc/bnfc/current/>

Prevention of mother to child transmission (PMTCT) can be improved through a combination of routine antenatal screening, antiviral drugs during the latter stages of pregnancy, and HBV vaccination to the baby starting at birth. Where resources permit, HBV immunoglobulin (HBIG) can further reduce the risk of vertical transmission.

Despite the efficacy of these strategies in managing or preventing individual cases, these interventions do not currently offer a route to global HBV eradication, due to a shortage of investment and resources, the large pool of undiagnosed cases, lack of routine diagnostic screening, the high cost of IFN

115 and HBIG, the lack of a curative therapy, substantial gaps in drug and  
116 vaccine coverage, and the potential for increasing drug resistance [8].

117

## 118 **APPLICATION OF NTD CRITERIA TO HBV**

119 We have applied the WHO criteria for NTDs to HBV [4], and refer to case  
120 studies and experience from our own clinical practice (Suppl. data file) to  
121 illustrate how HBV in Africa fulfills NTD criteria.

122

123 ***(i) NTDs ‘primarily affect populations living in tropical and sub-tropical***  
124 ***areas’.*** Although HBV is endemic globally, the bulk of morbidity and mortality  
125 is now borne by low/middle income countries in tropical and sub-tropical  
126 regions [6, 9]. In Africa, many populations are particularly vulnerable due to  
127 co-endemic HIV infection and other co-infections, host and viral genetic  
128 factors, poverty, and lack of education and infrastructure [7]. In this setting,  
129 HBV has been eclipsed by the more acute and tangible health crisis of  
130 human immunodeficiency virus (HIV); only now in the ART era is it re-  
131 emerging as a visible threat [S2]. One illustration of this shift is the increase  
132 in deaths from HBV-related liver cancer over time that contrasts a reduction  
133 in AIDS deaths [10].

134

135 ***(ii) NTDs ‘disproportionately affect populations living in poverty; and***  
136 ***cause.... morbidity and mortality, including stigma and discrimination’.***  
137 HBV is part of a cycle of poverty, with a high burden of morbidity and  
138 mortality in young adults [S1, S4, S9]. The economic burden on individual  
139 families can be particularly catastrophic in low and middle income settings  
140 [11] [S4, S5, S7], although robust data are lacking for Africa. In resource-poor  
141 settings, lack of education and scarce healthcare resources impinge on  
142 successful diagnosis and monitoring [S4, S7], as well as failure to control  
143 symptoms where relevant [S9]. Stigma and discrimination are often invisible,  
144 but can be potent and highly relevant challenges to the success of scaling up  
145 interventions for prevention, diagnosis, and treatment [12] [S5, S6, S7].

146

147 ***(iii) NTDs are ‘immediately amenable to broad control, elimination or***  
148 ***eradication by applying... public health strategies’.*** We already have an

armamentarium of strategies with which to tackle HBV prevention and treatment (Figure 2). In order to be widely and robustly deployed, these approaches should interlink with existing resources and infrastructure wherever possible [S2].

153

**(iv) NTDs are ‘relatively neglected by research – i.e., resource allocation is not commensurate with the magnitude of the problem’.** Compared with other blood-borne viruses, namely HIV and hepatitis C virus, which infect substantially lower numbers [7], HBV has attracted far fewer research resources, and this gap may actually be widening over time [13]. HBV mortality (887,000 deaths / year [3]) is now twice that of malaria (429,000 deaths / year [14]) but, malaria receives nearly five-fold more funding (Figure 3). Moreover, development of clinical programs for hepatitis testing and treatment are fragmented in comparison to the progressive infrastructure that has emerged to tackle HIV [S7].

164

## 165 **RECOMMENDATIONS BASED ON NTD FRAMEWORK**

Even for an organism that is not officially recognized as an NTD, there is much to be learnt from the NTD paradigm that could accelerate progress in tackling HBV. The ethos of combining several public health strategies, and integrating care for different diseases, is captured by the approach advocated for NTDs [4], and is also a helpful model for HBV. Particularly in the African subcontinent, where other NTD models have had significant impact [15], using this framework for HBV could promote awareness, leverage advocacy and resources, and promote integration of HBV prevention and treatment into existing HIV infrastructure [5].

In the following section, we use suggested interventions for NTDs to discuss briefly how these are pertinent to reducing – and ultimately eliminating – HBV infection as a public health threat.

178

### 179 **(i) ‘Intensified case management’**

Based on the significant numbers of individuals lost at every step of the ‘cascade’ from diagnosis through to successful treatment and prevention (Figure 1), enhanced efforts are needed to promote linkage through care

183 pathways. Enhanced HBV testing is crucial to facilitate entry into clinical care,  
184 allowing treatment to reduce the risk of onward spread, including  
185 underpinning PMTCT [S8]. Initially, this may rely on using existing diagnostic  
186 platforms (based on serology), but investment is required in developing and  
187 rolling out new approaches, including molecular testing strategies that are  
188 more sensitive, provide enhanced data (e.g. detection of drug resistance), and  
189 are fast enough to enable point-of-care testing. This can often be transferred  
190 from technology that has been initially developed for the diagnosis of other  
191 diseases.

192

193 The role and significance of stigma associated with HBV infection in Africa is  
194 largely unreported in the literature. However, individual testimony leaves no  
195 doubt that this is a significant barrier to diagnosis and clinical care [S5, S6].  
196 Gaining a better understanding of the extent and nature of stigma and  
197 discrimination in different populations is a crucial first step, in parallel with  
198 enhanced efforts to educate patients, health care workers and the public.

199

## 200 **(ii) 'Preventive chemotherapy'**

201 Although antiviral therapy for HBV is generally regarded as treatment rather  
202 than prevention, in the majority of cases it renders individuals aviraemic,  
203 preventing onward transmission. Antiviral therapy for HBV (Table 1) should be  
204 made accessible, ideally capitalizing on the supply chains and distribution  
205 infrastructure that have been developed for HIV (and/or other prevalent  
206 infections, such as tuberculosis and malaria) [5]. Research efforts are still  
207 required to identify prognostic factors that predict differential response to  
208 therapy and allow tailoring of care.

209 PMTCT can progressively become a realistic goal by expanding access to  
210 antenatal diagnostics, simple treatment interventions such as maternal  
211 tenofovir during trimester three, and HBV vaccination for all babies, with the  
212 first dose delivered at birth [8] [S8]. Vaccination remains a cornerstone of  
213 prevention, but more work is needed to investigate the most effective catch-up  
214 immunization strategies to reduce the burden of HBV infection at a population  
215 level [S3, S4].

216

### 217 **(iii) ‘Sanitation and hygiene’**

218 Although this category of interventions is conventionally applied to reducing  
 219 food and water-borne infections, we here broaden our interpretation to include  
 220 other aspects of prophylaxis. Safety and security of medical supplies has  
 221 increasingly improved to reduce nosocomial transmission of blood borne  
 222 viruses over recent decades [S3]. However, sterile practices need to be more  
 223 widely promoted and guaranteed, to assure the safety of other procedures  
 224 such as scarification, tattoos, piercings and circumcision that may occur in  
 225 community settings. Provision of condoms alongside education regarding safe  
 226 sex, particularly for high risk groups such as sex workers and men who have  
 227 sex with men, is another important strategy for prevention.

228

### 229 **CONCLUSIONS**

230 Elimination of HBV infection has gained status within international health and  
 231 development agendas, but is a complex clinical and public health challenge  
 232 that currently lacks proportionate multi-lateral commitment from pharma,  
 233 government, commissioners, funders and the research community. The many  
 234 parallels with other NTDs are clearly exemplified by vulnerable populations of  
 235 the African subcontinent. By viewing HBV within the NTD framework, we can  
 236 improve approaches to reducing the burden of disease and move towards  
 237 eventual elimination.

238



## 239 **FIGURE LEGENDS**

240 **Figure 1. The HBV cascade.** Diagrammatic representation of the total burden  
241 of HBV infection, and the subsets of individuals who are diagnosed (orange),  
242 linked to care (purple), engaged with care (dark blue), on treatment (light blue)  
243 and have suppressed viraemia (green). An estimate of the proportion of cases  
244 undiagnosed vs. diagnosed (91% vs. 9%, respectively) is based on the WHO  
245 factsheet [3]. The proportion who flow from each pool to the next is otherwise  
246 represented by a question mark, as these numbers are not represented by  
247 robust data.

248

249 **Figure 2. A package of interventions to move towards elimination of**  
250 **HBV infection as a public health threat.** Suggested measures are aligned  
251 with WHO interventions for NTDs.

252

253 **Figure 3. Funding allocations for HBV, HCV, HIV and malaria, 2013-2018.**  
254 Data from the US National Institutes for Health (NIH) estimated funding for  
255 research, condition and disease categories 2013-2018 (projected), available  
256 at [https://report.nih.gov/categorical\\_spending.aspx](https://report.nih.gov/categorical_spending.aspx). Figures for the projected  
257 funding allocation (for 2018) relative to HBV are given. \*Research into  
258 'malaria' and 'malaria vaccine' have been subdivided in the dataset.

259

## 260 **SUPPORTING INFORMATION LEGEND**

261 This document contains supplementary data to support our view that Hepatitis  
262 B Virus (HBV) can helpfully be represented within the framework set out for  
263 Neglected Tropical Diseases by the World Health Organization (WHO) [1].  
264 This is in line with aims stated within Sustainable Development Goals [2].  
265 Complementary evidence gathered from different locations in Africa illustrates  
266 the ways in which HBV infection meets the criteria for NTDs. These scenarios  
267 (labelled S1 to S9, and presented by geography from South to North)  
268 contribute important insights into how the NTD paradigm can be helpful in  
269 informing strategies to improve diagnosis, treatment and prevention of HBV  
270 infection, with the ultimate goal of eliminating infection as a public health  
271 threat.

272

273

## 274 REFERENCES

275 [1] WHO. Draft global health sector strategy on viral hepatitis, 2016-2021;  
276 2016.

277 [2] Griggs D, Stafford-Smith M, Gaffney O, Rockstrom J, Ohman MC,  
278 Shyamsundar P, et al. Policy: Sustainable development goals for people and  
279 planet. *Nature* 2013;495:305-307.

280 [3] WHO. Hepatitis B Fact Sheet. 2017 [cited 2017 May]; Available from:  
281 <http://www.who.int/mediacentre/factsheets/fs204/en/>

282 [4] WHO. Neglected tropical diseases. 2017 [cited 2017 May]; Available  
283 from: [http://www.who.int/neglected\\_diseases/diseases/en/](http://www.who.int/neglected_diseases/diseases/en/)

284 [5] Lemoine M, Eholie S, Lacombe K. Reducing the neglected burden of  
285 viral hepatitis in Africa: strategies for a global approach. *J Hepatol*  
286 2015;62:469-476.

287 [6] CDC. Viral hepatitis. 2017 [cited 2017 May]; Available from:  
288 <https://www.cdc.gov/hepatitis/populations/api.htm>

289 [7] Matthews PC, Geretti AM, Goulder PJ, Klenerman P. Epidemiology  
290 and impact of HIV coinfection with hepatitis B and hepatitis C viruses in Sub-  
291 Saharan Africa. *J Clin Virol* 2014;61:20-33.

292 [8] Jooste P, van Zyl A, Adland E, Daniels S, Hattingh L, Brits A, et al.  
293 Screening, characterisation and prevention of Hepatitis B virus (HBV) co-  
294 infection in HIV-positive children in South Africa. *J Clin Virol* 2016;85:71-74.

295 [9] Lemoine M, Nayagam S, Thursz M. Viral hepatitis in resource-limited  
296 countries and access to antiviral therapies: current and future challenges.  
297 *Future Virol* 2013;8:371-380.

298 [10] Lozano R, Naghavi M, Foreman K, Lim S, Shibuya K, Aboyans V, et al.  
299 Global and regional mortality from 235 causes of death for 20 age groups in  
300 1990 and 2010: a systematic analysis for the Global Burden of Disease Study  
301 2010. *Lancet* 2012;380:2095-2128.

302 [11] Lu J, Xu A, Wang J, Zhang L, Song L, Li R, et al. Direct economic  
303 burden of hepatitis B virus related diseases: evidence from Shandong, China.  
304 *BMC Health Serv Res* 2013;13:37.

305 [12] Alizadeh AH, Ranjbar M, Yadollahzadeh M. Patient concerns regarding  
306 chronic hepatitis B and C infection. East Mediterr Health J 2008;14:1142-  
307 1147.

308 [13] Head MG, Fitchett JR, Cooke MK, Wurie FB, Hayward AC, Atun R. UK  
309 investments in global infectious disease research 1997-2010: a case study.  
310 Lancet Infect Dis 2013;13:55-64.

311 [14] WHO. Malaria Fact Sheet. 2016 [cited 2017 May]; Available from:

312 [15] Hotez P, Aksoy S. PLOS Neglected Tropical Diseases: Ten years of  
313 progress in neglected tropical disease control and elimination ... More or less.  
314 PLoS Negl Trop Dis 2017;11:e0005355.

315



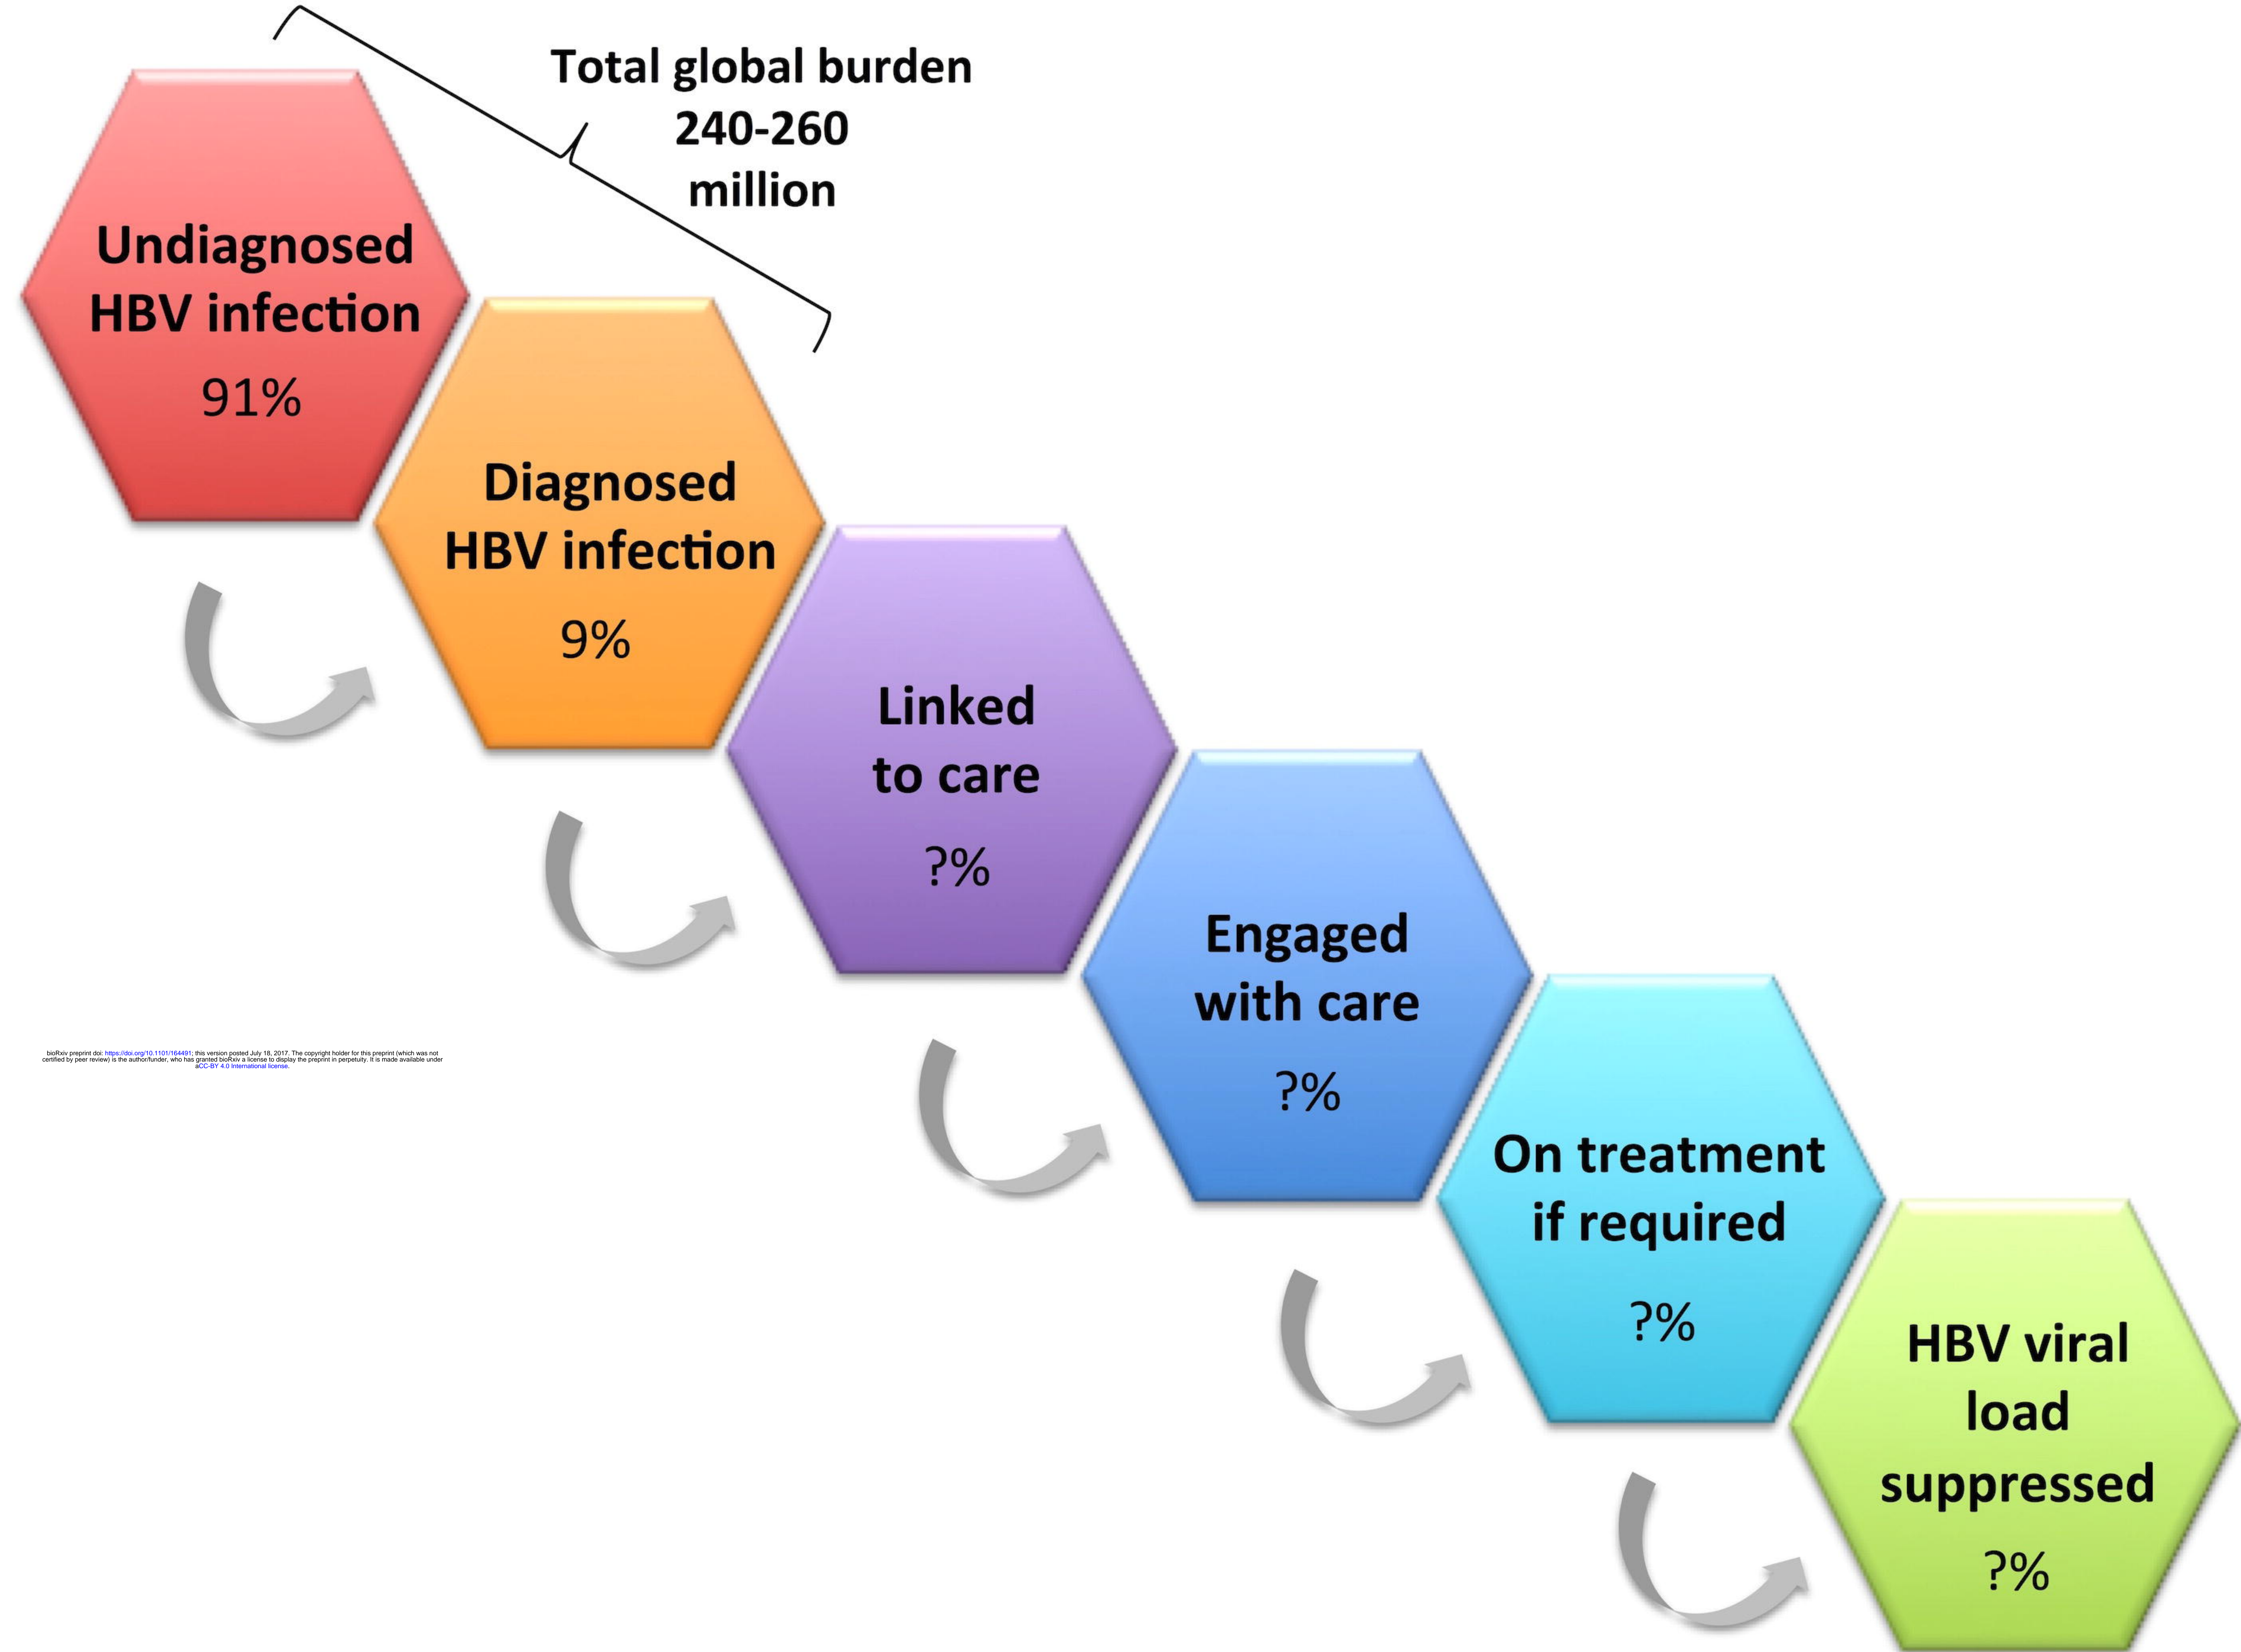



### **Treatment:**

- Sustained, affordable supply of antiviral therapy integrated with other programs (e.g. ART for HIV)
- Monitoring and follow-up for patients on therapy, including renal function and HBV viral load
- Surveillance and monitoring where this can be provided (serial LFTs, U&Es, fibroscan)

### **Diagnosis:**

- Roll-out of screening integrated with HIV VCT
- Improved antenatal screening programs for PMTCT
- Development of rapid point-of-care tests
- Enhanced molecular testing to detect drug resistance

### **Sterile practice:**

- Safe blood and tissue products
- Clean needles – for clinical practice but also tattoos, piercing etc
- Attention to other transmission routes e.g. scarification, circumcision

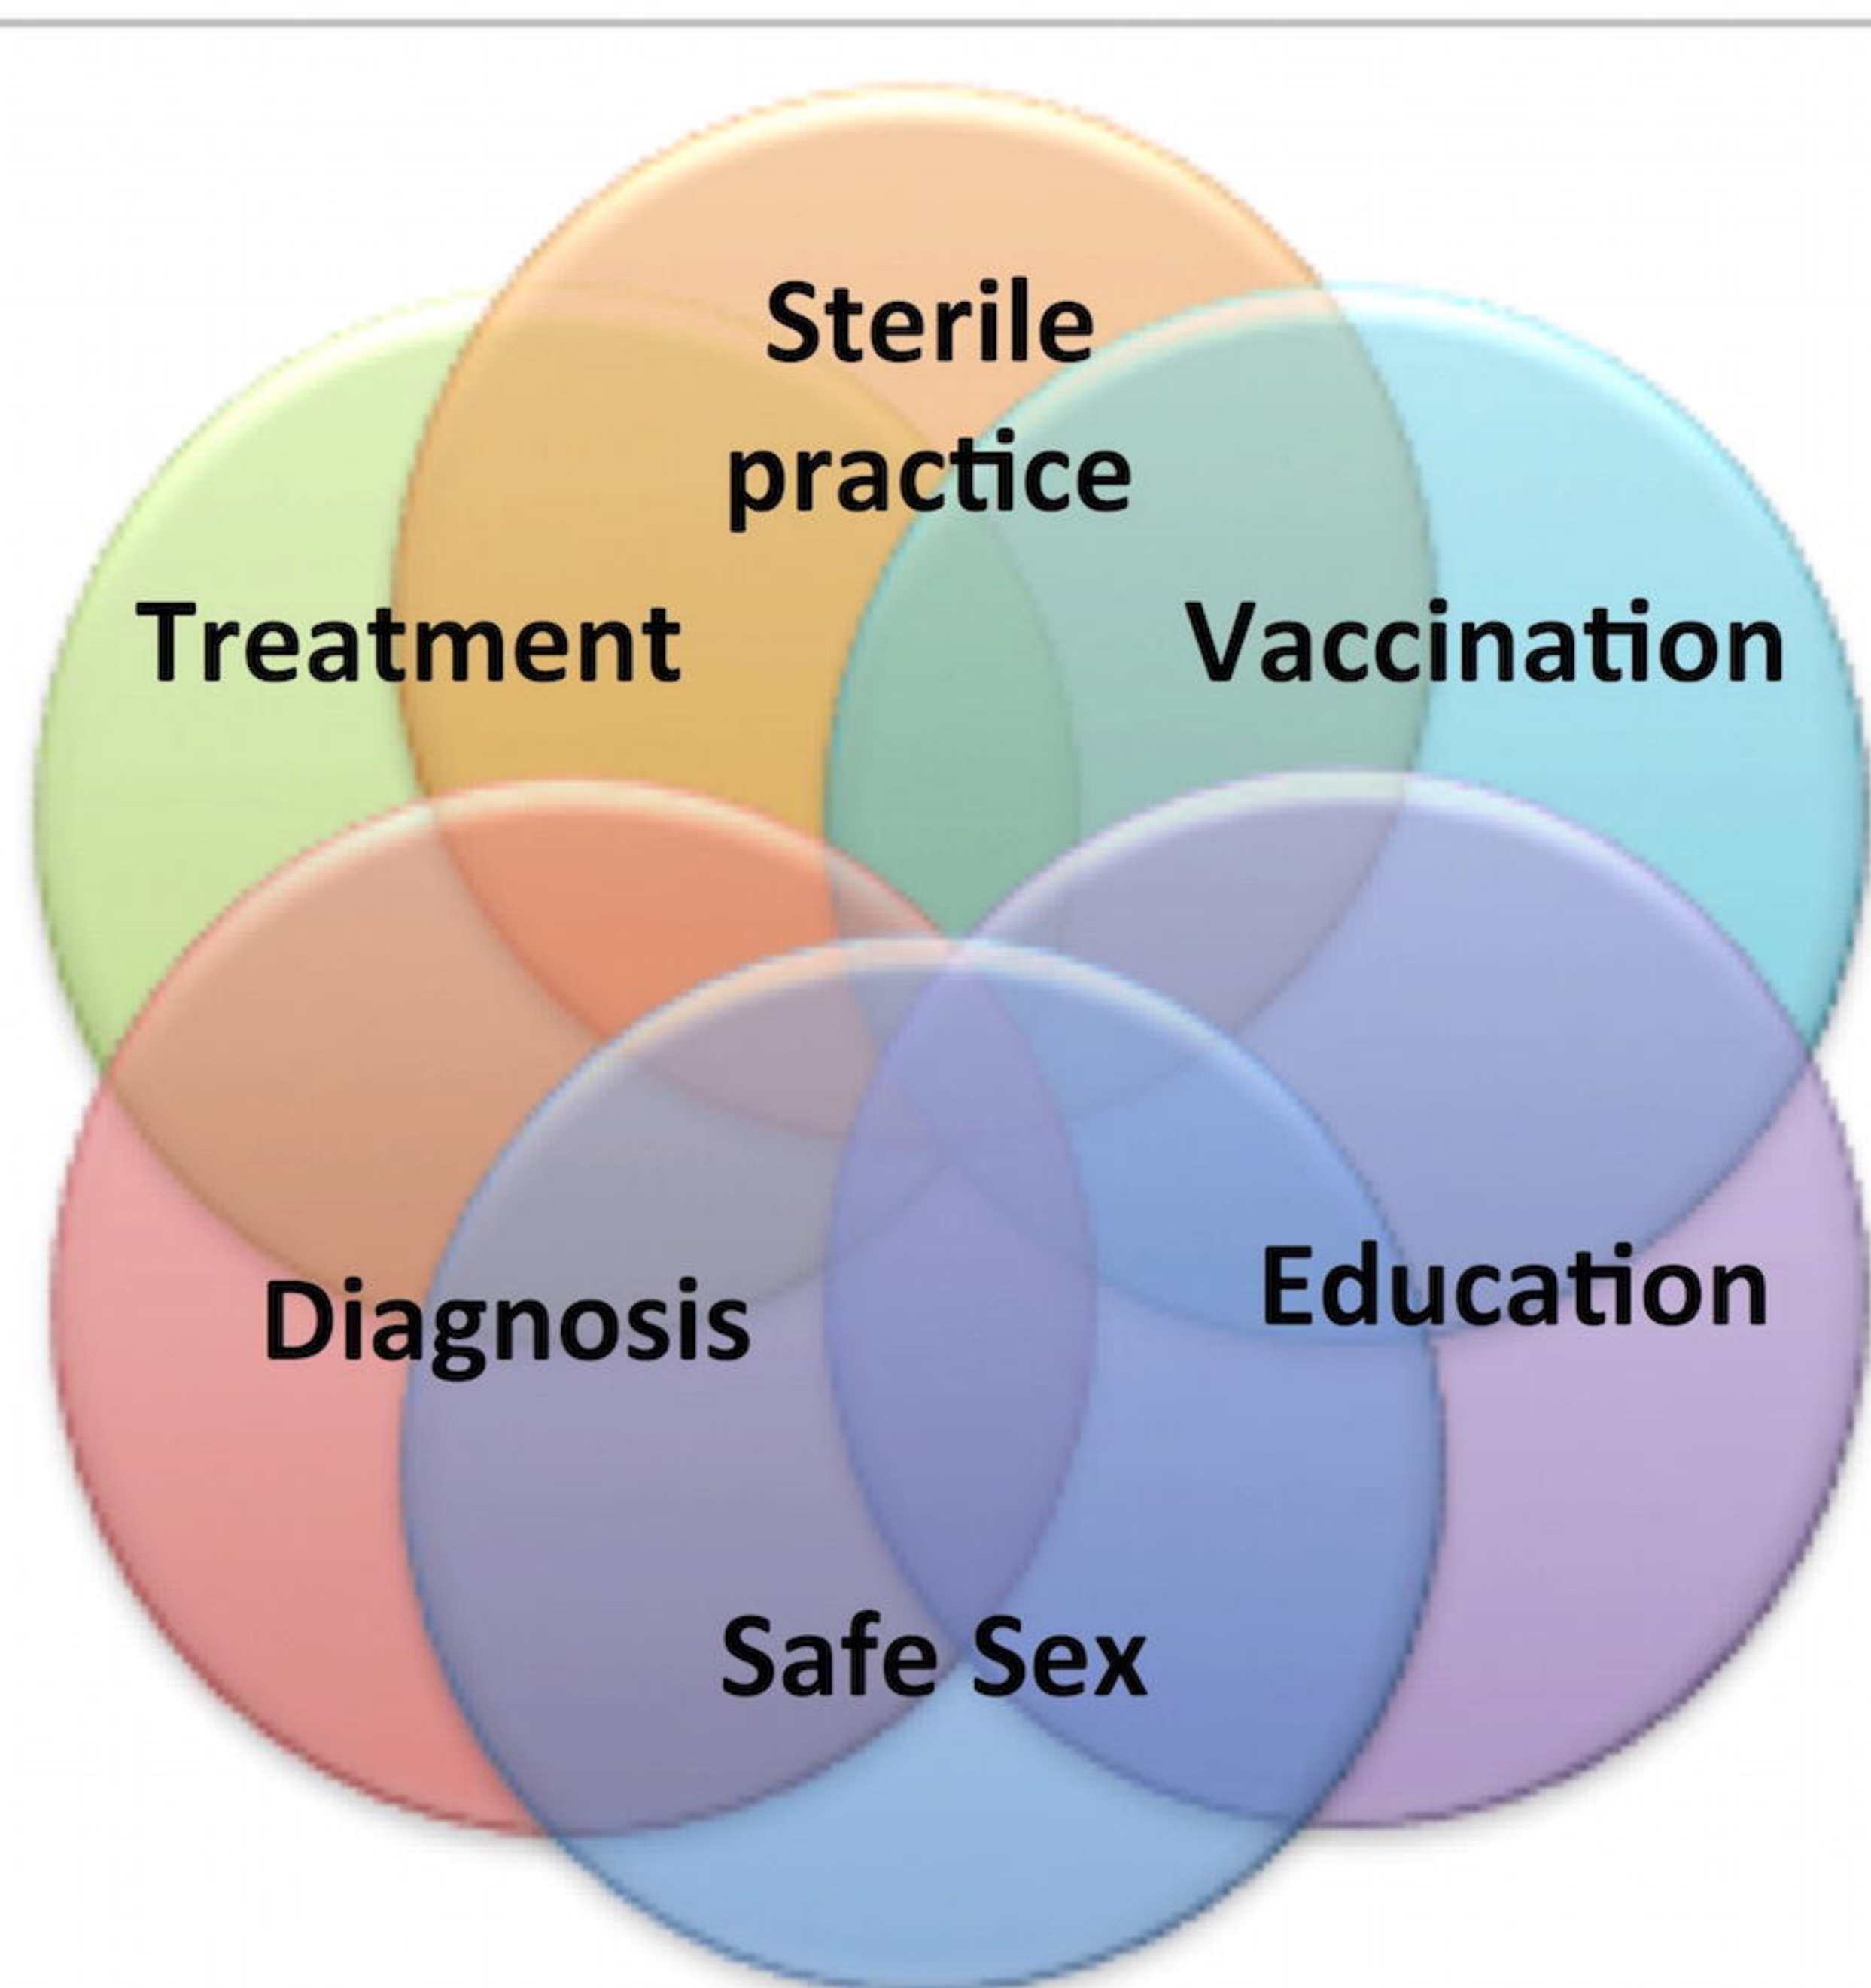

### **Safe sex:**

- Education alongside safe sex messages for other STI's
- Condom provision
- Focus resources on high risk groups (partners of HBV carriers, sex workers, MSM)

### **Vaccination:**

- Advocacy for a birth dose for all babies for PMTCT
- Delivery of recombinant HBsAg vaccine integrated within EPI
- Improved vaccine coverage with catch-up campaigns for high risk groups (HCWs, MSM)
- Enhanced efforts from the research community to develop therapeutic vaccinations

### **Education:**

- Campaigns to encourage screening
- Research to understand beliefs and behaviour
- Education to reduce stigma and discrimination
- Enhancement of compliance with therapy
- Helping mothers to protect their children – testing and vaccination



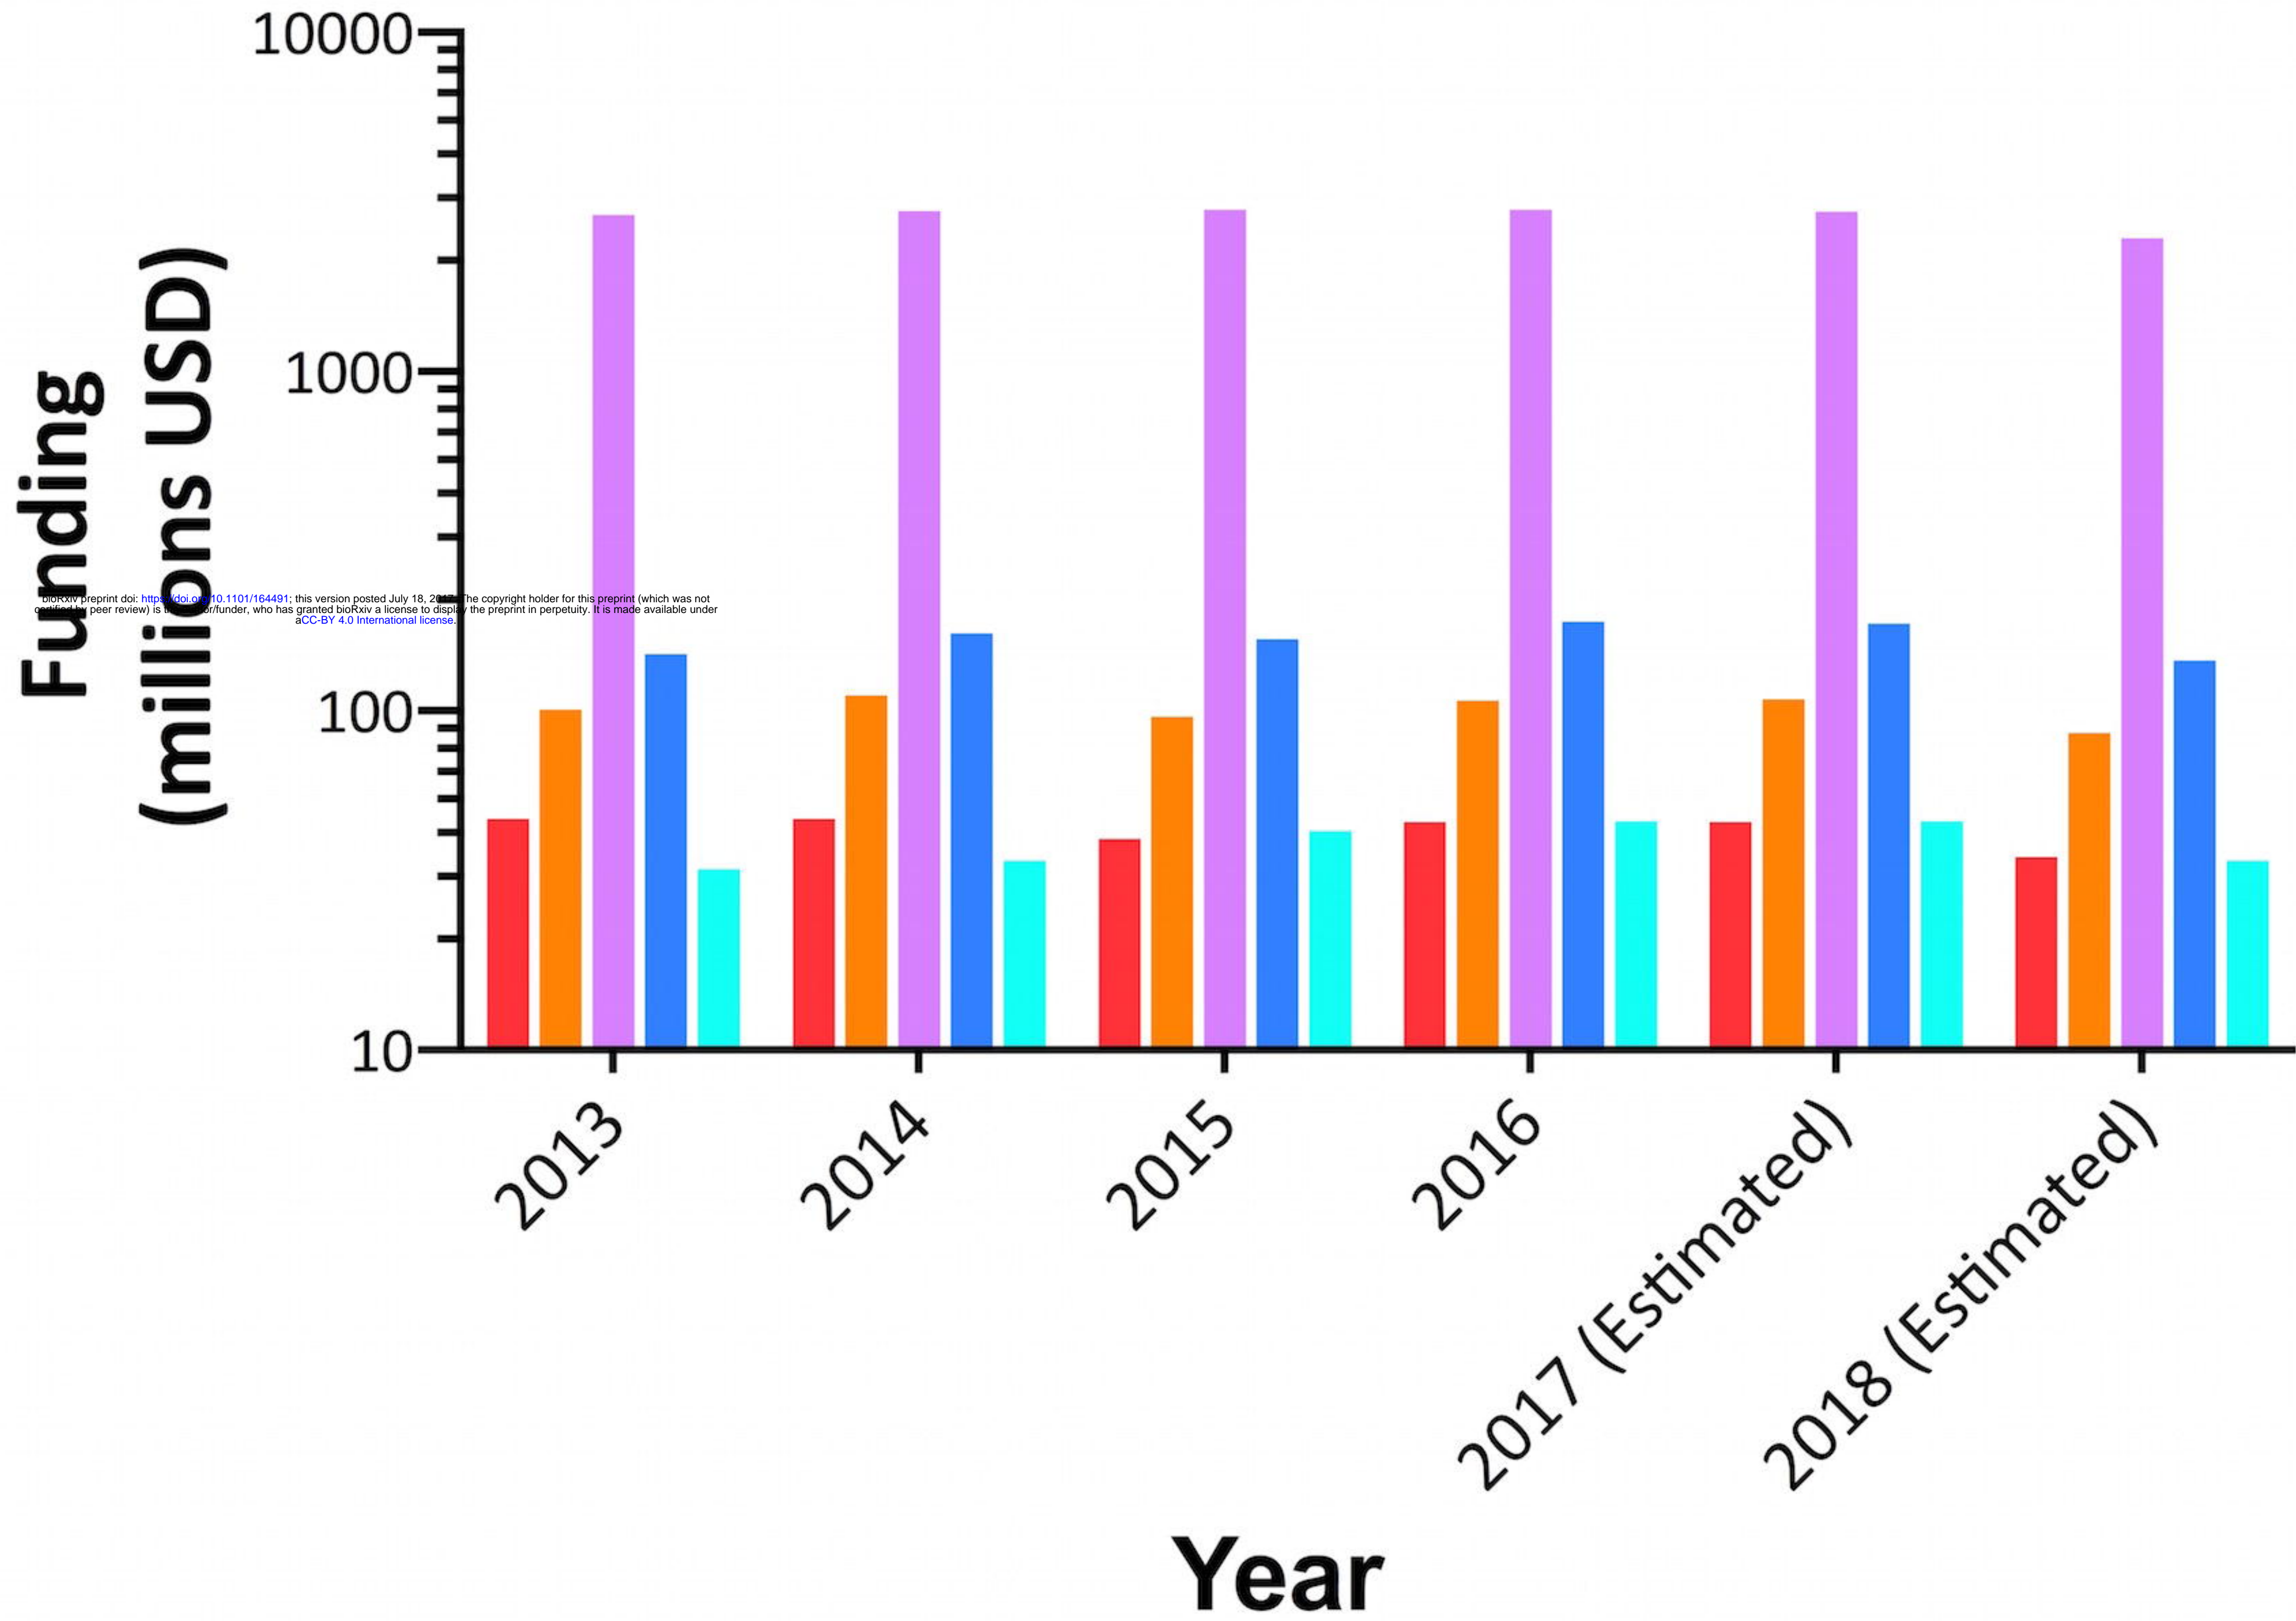

| Funding relative to Hepatitis B Virus |                   |       |
|---------------------------------------|-------------------|-------|
| <div></div>                           | Hepatitis B Virus | -     |
| <div></div>                           | Hepatitis C Virus | 2.3x  |
| <div></div>                           | HIV/AIDS          | 66.8x |
| <div></div>                           | Malaria           | 3.8x  |
| <div></div>                           | Malaria Vaccine   | 1.0x  |
